# Supplementary material
Source: PubMed Central journal article supplement (PMC2818682)
Supplement: NIHMS164338-supplement-1_si_001.pdf [file NIHMS164338-supplement-1_si_001.pdf]

Table S1. QM/MM calculations of the energetics for the ring-opening reactions of inhibitions in the active site of MMP2<sup>a</sup>

| inhibitor                                                     | barrier height | reaction enthalpy            |                            |
|---------------------------------------------------------------|----------------|------------------------------|----------------------------|
|                                                               |                | P1<br>(unprotonated product) | P2<br>(protonated product) |
| ( <i>R</i> )-SB-3CT ( <b>3</b> ) <sup>b</sup> EE <sup>c</sup> | 19.9           | -21.1                        | -0.7                       |
| ( <i>R</i> )-SB-3CT ( <b>3</b> ) <sup>b</sup> ME <sup>c</sup> | 21.2           | -24.0                        | -9.5                       |
| oxirane analogue ( <b>4</b> ) <sup>b</sup> EE <sup>c</sup>    | 21.5           | -13.1                        | -15.1                      |
| oxirane analogue ( <b>4</b> ) <sup>b</sup> ME <sup>c</sup>    | 22.9           | -14.8                        | -21.9                      |

(a) ONIOM(B3LYP/6-311+G(d,p):AMBER)//ONIOM(B3LYP/6-31G(d):AMBER) level of theory; energies in kcal/mol.

(b) See Figure 5.

(c) EE: electronic embedding; ME: mechanical embedding.

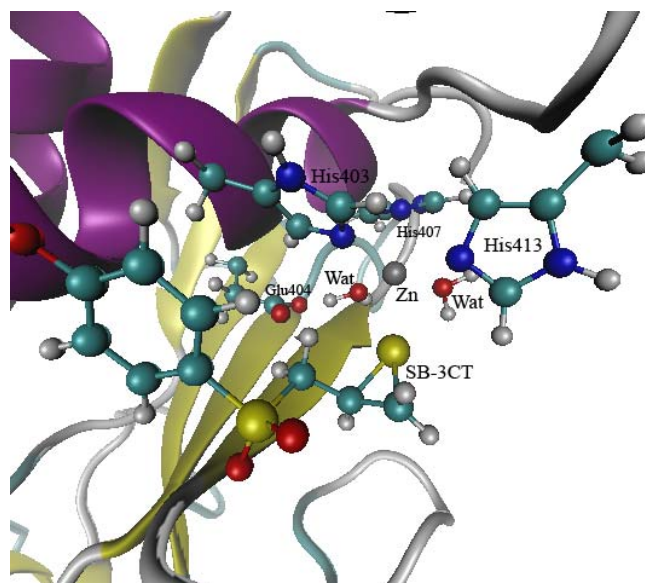

FIGURE S1. The active site of the reactant complex from an optimal conformation in molecular dynamics simulation for the MMP2 and (*S*)-SB-3CT. Residues are shown in ball-and-stick representation with atom colored according to atom types (H, C, N, O, S, Zn, shown in white, cyan, blue, red, yellow, and grey, respectively).

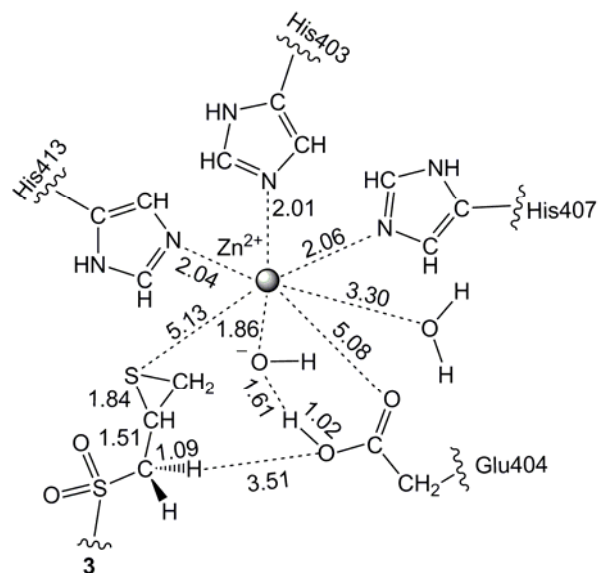

FIGURE S2. QM/MM calculations of the complex of *(R)*-SB-3CT (**3**) and MMP2 with two waters at the active site optimized at the ONIOM(B3LYP/6-31G(d):AMBER) level of theory. Key bond lengths are in Å. Ball-and-stick representation of QM region and cartoon representation of protein are shown in Figure 2.

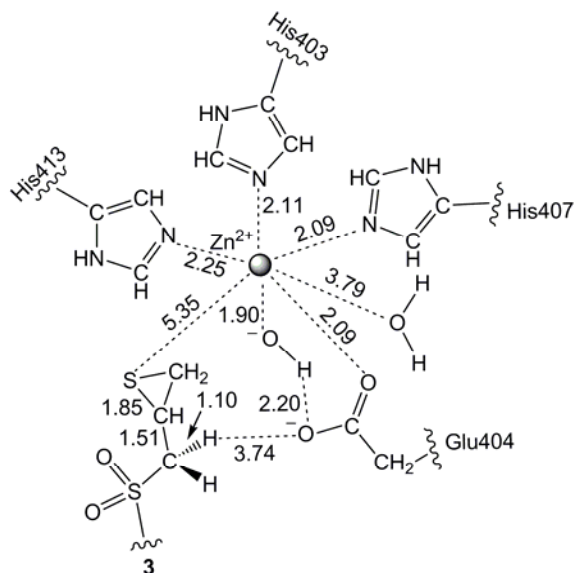

**3-R** 0.0

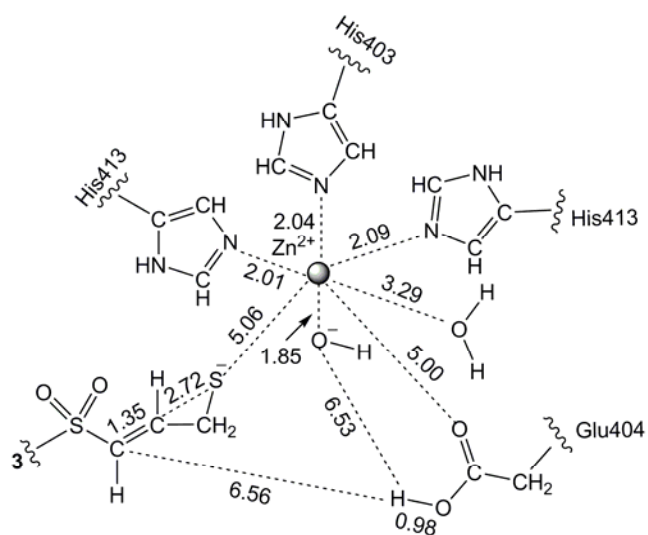

**3-P** 15.8

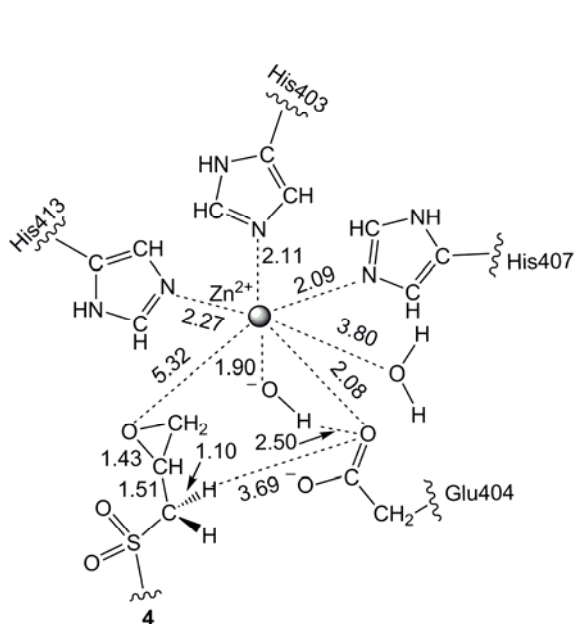

**4-R** 0.0

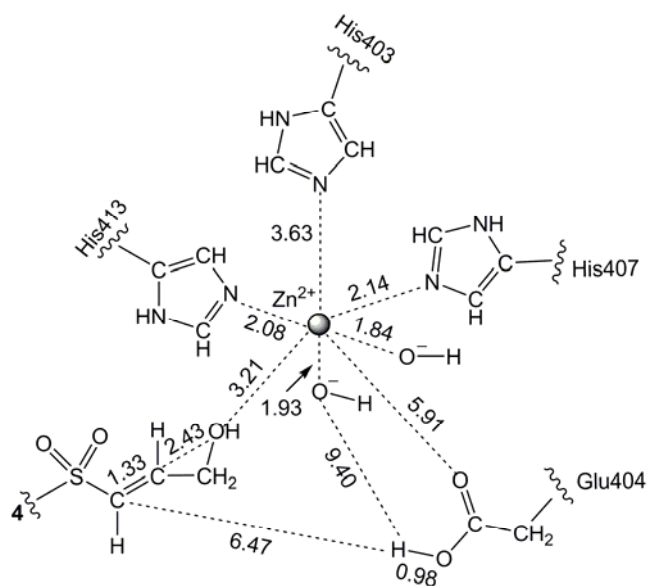

**4-P** 6.6

FIGURE S3. Reactants and products for (*R*)-SB-3CT (**3**) and its oxirane analogue (**4**) with hydroxide in the MMP2 active site optimized at the ONIOM(B3LYP/6-31G(d):AMBER) level of theory. Energies (in kcal/mol) were calculated at ONIOM(B3LYP/6-311+G(d,p):AMBER) using an electronic embedding scheme with the reactant complexes as reference states. Key bond lengths are in Å. Ball-and-stick representation of QM region and cartoon representation of protein are shown in Figure 3.

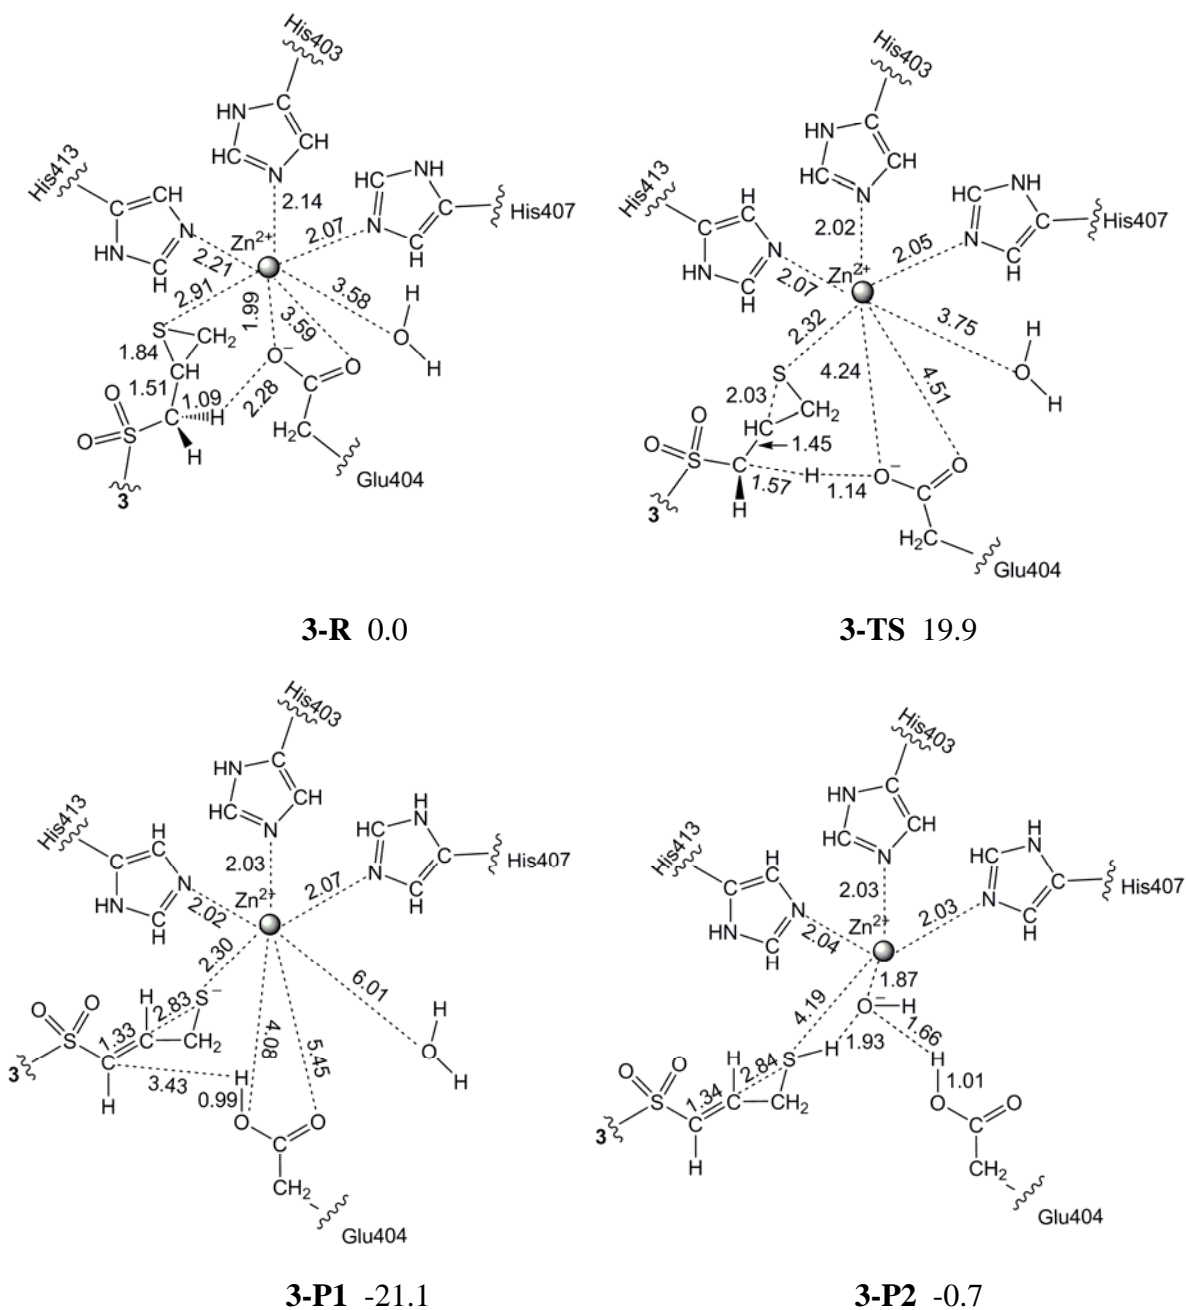

FIGURE S4. Reactants, transition states and products for (*R*)-SB-3CT (**3**) and its oxirane analogue (**4**) at MMP2 active site optimized at ONIOM(B3LYP/6-31G(d):AMBER) level of theory. Energies (in kcal/mol) were calculated at ONIOM(B3LYP/6-311+G(d,p):AMBER) using electronic embedding with the reactant complexes used as reference states. Key bond lengths are in Å. Ball-and-stick representation of QM region and cartoon representation of protein are shown in Figure 5.

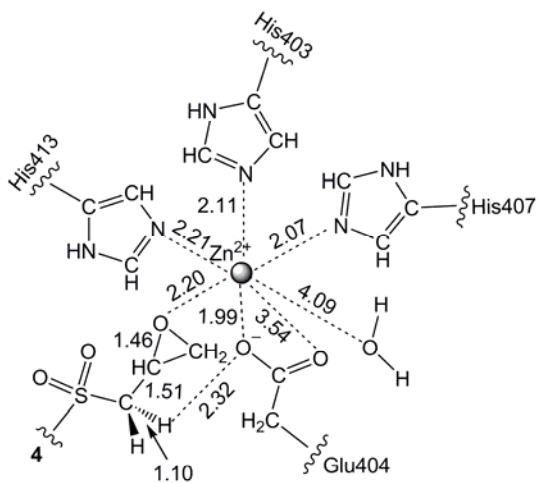

**4-R** 0.0

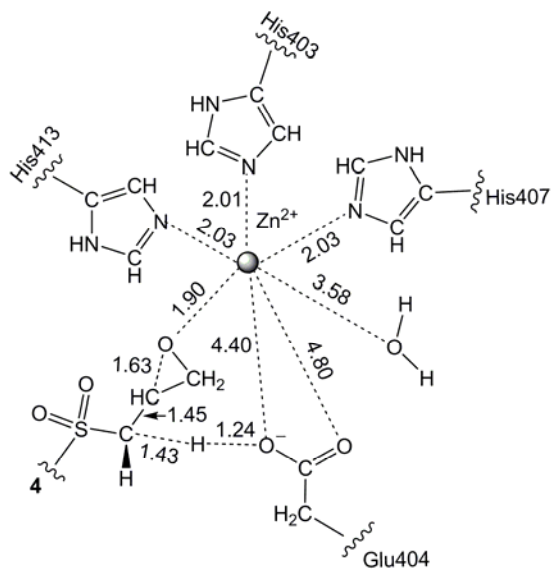

**4-TS** 21.5

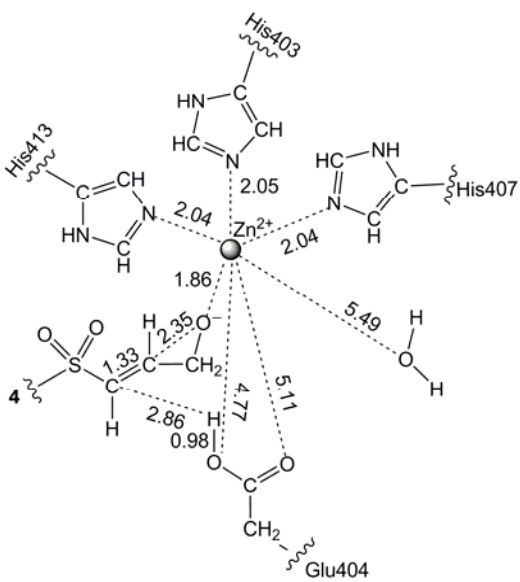

**4-P1** -13.1

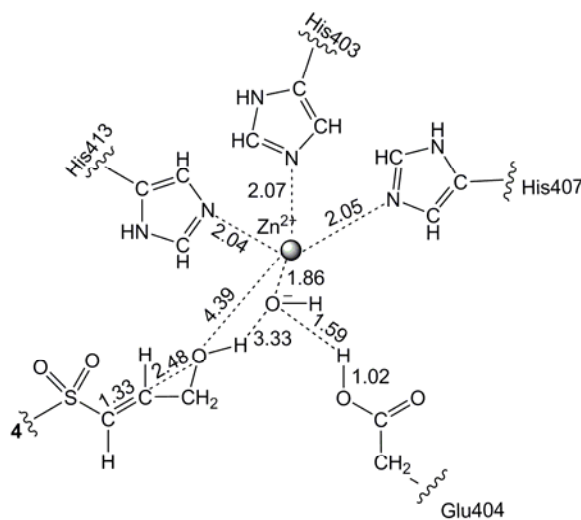

**4-P2** -15.1

FIGURE S4. (continued)

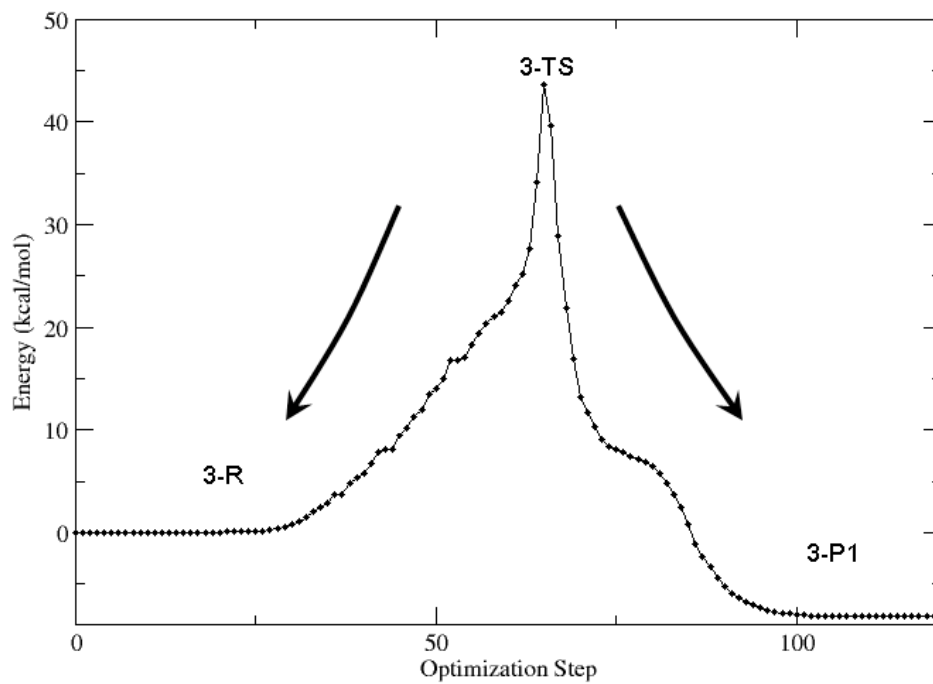

FIGURE S5. Optimization paths from transition state of (*R*)-SB-3CT (**3-TS**) to reactant and product. Optimization from **3-TS** to reactant side and product side were combined. The highest point along the path is transition state. Optimizations were carried out at ONIOM(B3LYP/6-31G(d):AMBER) level of theory using mechanical embedding. Relative energies with respect to reactant state were plotted in kcal/mol.

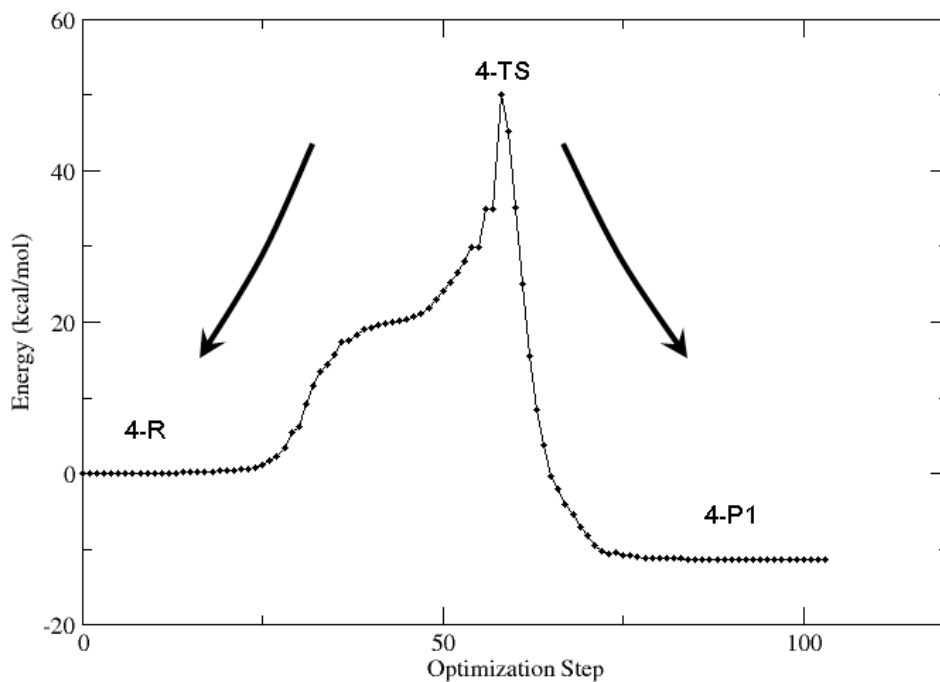

FIGURE S6. Optimization paths from transition state of (*R*)-SB-3CT oxirane analogue (**4-TS**) to reactant and product. Optimization from **4-TS** to reactant side and product side were combined. The highest point along the path is transition state. Optimizations were carried out at ONIOM(B3LYP/6-31G(d):AMBER) level of theory using mechanical embedding. Relative energies with respect to reactant state were plotted in kcal/mol.



AMBER force field parameters used for zinc ions

| atomic symbol | atomic mass |
|---------------|-------------|
| Zn            | 65.4        |

Lennard-Jones 6-12 potential for zinc ions

| atomic symbol | $R^*$ (Å) | $\epsilon$ (kcal/mol) |
|---------------|-----------|-----------------------|
| Zn            | 1.10      | 0.0125                |
